# Supplementary material for: Glaciological and meteorological monitoring at Long Term Ecological Research (LTER) sites Mullwitzkees and Venedigerkees, Austria, 2006–2022
Source: Copernicus journal article supplement (doi:10.5194/essd-16-4077-2024), 2024-09-12
Supplement: Supplementary file 1 [file essd-16-4077-2024-supplement.pdf]

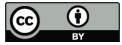

*Supplement of*

**Glaciological and meteorological monitoring at Long Term Ecological Research (LTER) sites Mullwitzkees and Venedigerkees, Austria, 2006–2022**

**Lea Hartl et al.**

*Correspondence to:* Lea Hartl ([lea.hartl@oeaw.ac.at](mailto:lea.hartl@oeaw.ac.at))

The copyright of individual parts of the supplement might differ from the article licence.

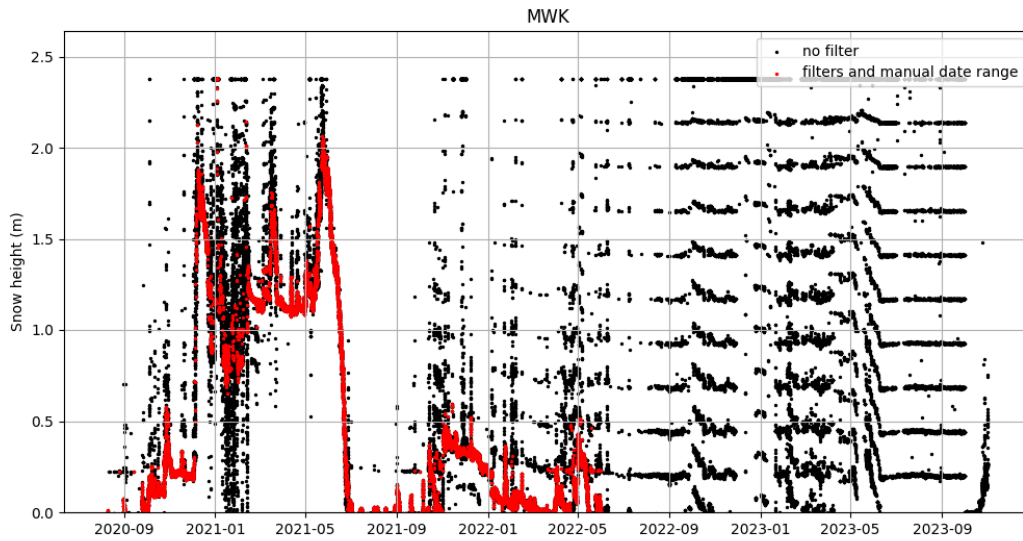

Fig. S1: Snow depth data at AWS\_MWK for the period of record. The red values represent an outlier filtered data set. No attempts were made to extract a meaningful signal after June 2022 due to the deterioration of the data quality.

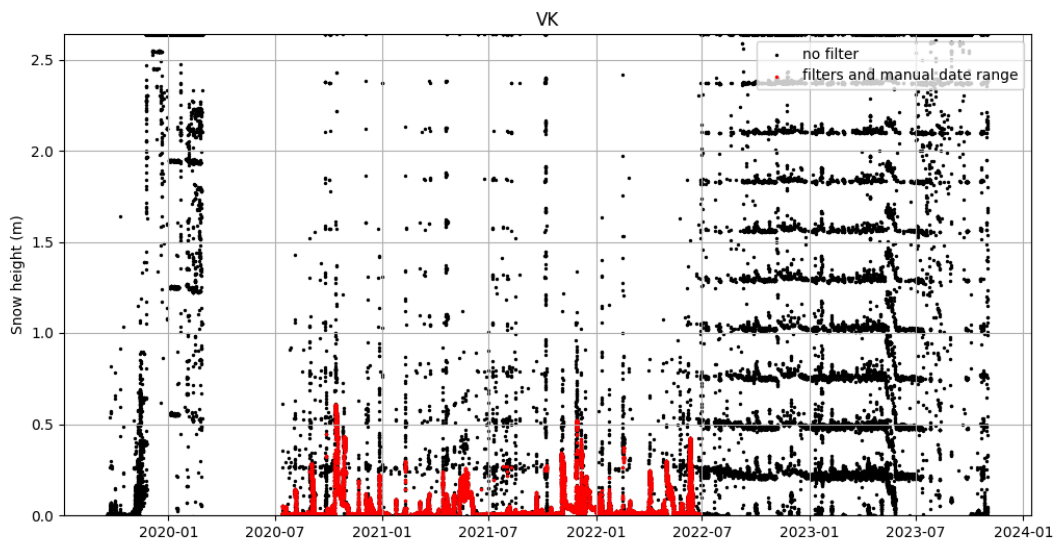

Fig. S2: Snow depth data at AWS\_VK for the period of record. The red values represent an outlier filtered data set. No attempts were made to extract a meaningful signal after July 2022 due to the deterioration of the data quality.

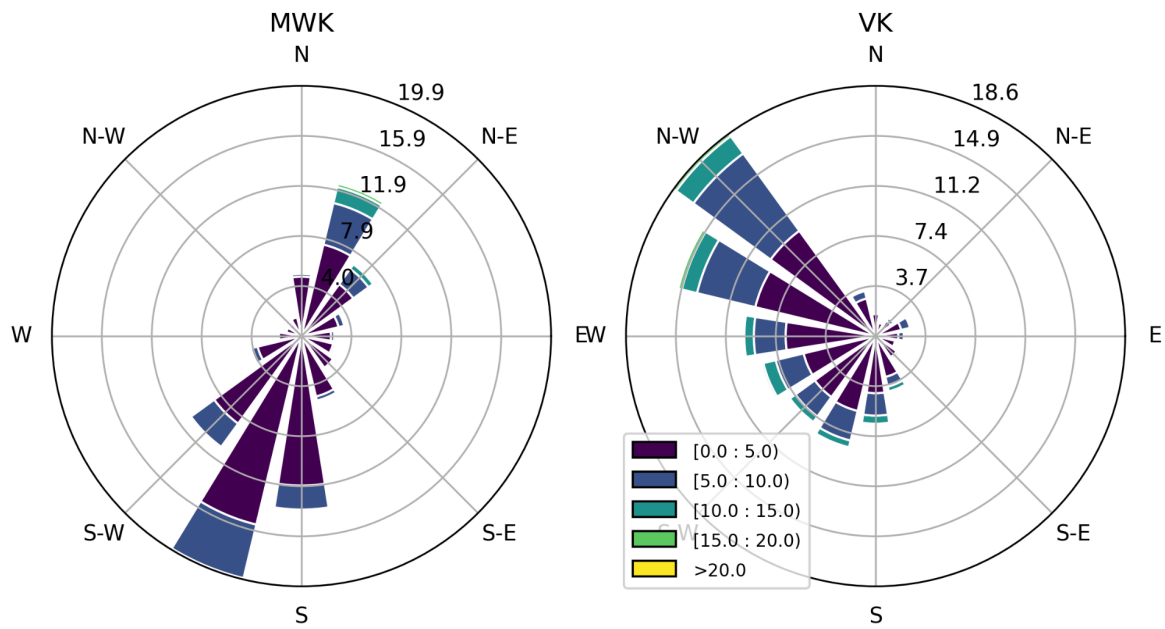

Fig. S3: Wind roses for AWS\_MWK and AWS\_VK. Colors: Wind speed (m/s). Radial axis: percentage of measurements.

Table S1: Mean monthly temperatures at AWS\_VK and AWS\_MVK (°C).

|       | 2019 | 2020 | 2021  | 2022  | 2023 | 2020 | 2021  | 2022 | 2023 |
|-------|------|------|-------|-------|------|------|-------|------|------|
| Month | VK   |      |       |       |      | MWK  |       |      |      |
| 1     | /    | -6.4 | -13.5 | -10.0 | -9.9 | /    | -13.5 | -9.2 | -9.6 |
| 2     | /    | -8.1 | -6.9  | -9.8  | -8.8 | /    | -7.0  | -9.4 | -8.3 |
| 3     | /    | -9.2 | -10.4 | -7.7  | -7.6 | /    | -9.8  | -7.4 | -7.4 |
| 4     | /    | -3.5 | -9.6  | -6.8  | -8.4 | /    | -8.9  | -6.1 | -7.9 |
| 5     | /    | -2.8 | -4.9  | -0.1  | -1.9 | /    | -4.5  | 0.7  | -1.2 |
| 6     | /    | 0.9  | 3.7   | 4.4   | 2.5  | /    | 4.1   | 5.1  | 3.3  |
| 7     | /    | 3.7  | 4.1   | 5.0   | 4.9  | /    | 4.4   | 5.8  | 5.4  |
| 8     | /    | 5.0  | 2.4   | 4.6   | 5.0  | 5.4  | 3.0   | 5.3  | 5.6  |
| 9     | /    | 2.2  | 2.3   | -1.0  | 5.7  | 2.5  | 3.0   | -0.4 | 5.8  |
| 10    | 0.6  | -3.3 | -2.1  | 1.7   | 1.1  | -3.2 | -1.8  | 1.7  | 1.2  |
| 11    | -6.5 | -2.4 | -5.2  | -5.6  | /    | -2.2 | -5.2  | -5.4 | /    |
| 12    | -7.5 | -8.3 | -9.2  | -7.3  | /    | -8.9 | -8.3  | -7.5 | /    |
